# Supplementary material
Source: publisher figshare collection journal article supplement (https://tandf.figshare.com/ndownloader/files/20722311)
Supplement: Supplementary file 1 [file 20722311]

**A facile method for the synthesis of free-standing two-dimensional** **covalent organic monolayers in solution**

Hui Qiang,a Wei-Bo Hu,*b Tao Chen,b,c Yahu A. Liu,d Xue-Shun Jia,a Biao Jiang*b and Ke Wen*b,e

**Table of Contents**

| General Methods | S4 |
| --- | --- |
| Synthetic Procedures | S4-S8 |
| **Figure S1.** 1H NMR spectrum of **BTTH** in CDCl3 | S9 |
| **Figure S2.** 13C NMR spectrum of **BTTH** in CDCl3 | S10 |
| **Figure S3.** Mass spectrum of **BTTH** | S10 |
| **Figure S4.** 1H NMR spectrum of **TFPB** in CDCl3 | S11 |
| **Figure S5.** Tyndall effects | S12 |
| **Figure S6.** FT-IR spectra of **DAP5**, **BTTH**, and **DAP5-COM-1** | S13 |
| **Figure S7.** FT-IR spectra of **DAP5**, **TFPB**, and **DAP5-COM-2** | S13 |
| **Figure S8.** Size distribution of the dispersed polymer particles of **DAP5-COM-1** | S14 |
| **Figure S9.** Size distribution of the dispersed polymer particles of **DAP5-COM-2** | S15 |
| **Figure S10.** SEM images of **DAP5-COM-2** | S15 |
| **Figure S11.** TEM image of **DAP5-COM-2** | S16 |
| **Figure S12.** SEM images of reaction solution of **DAP5** and **TFPB** | S17 |
| **Figure S13.** SEM images of reaction solution of **DAP5** and **TFPB** | S18 |
| **Figure S14.** Structures of the ideal hexagonal monomeric network units of **DAP5-COM-1** and **DAP5-COM-2** | S19 |
| **Figure S15.** AFM images and cross-section analysis of **DAP5-COM-1** | S20 |
| **Figure S16.** AFM images and cross-section analysis of **DAP5-COM-2** | S21 |
| **Figure S17.**AFM images and cross-section analysis of the mixture of **DMP5** and **BTTH** (3:2, molar ratio) in dioxane without heating | S22 |
| **Figure S18.** AFM images and cross-section analysis of the mixture of **DMP5** and **TFPB** (3:2, molar ratio) in dioxane without heating | S22 |
| **Figure S19.** AFM images of **DAP5-COM-1** at 7days | S23 |
| **Figure S20.** 3D fluorescence contour spectroscopy of **DAP5-COM-1** in dioxane | S23 |
| **Figure S21.** Excitation spectrum of **DAP5-COM-1** in dioxane | S24 |
| **Figure S22.** Emission spectrum of **DAP5-COM-1** in dioxane | S25 |
| **References** | S25 |

**General Methods**

Unless otherwise noted, all commercial reagents and solvents were used without purification.Separations and purifications by flash column chromatography were performed on Merck silica gel (200-300 mesh). 1H and 13C NMR spectra were recorded at a 500 MHz spectrometer with TMS as the reference. Mass spectra were recorded on an Agilent 6230 TOF LC/MS. (FE)-SEM studies were performed on a Hitachi S4800. The samples were prepared by dropping the corresponding reaction solution onto silicon wafers, dried naturally, and then coated with gold using a sputter coater. TEM studies were performed on TECNAI-G2S-TWIN and the samples were prepared by carefully dropping the corresponding reaction solution onto the carbon coated copper grid and dried naturally. AFM studies were performed on a Bruker FastScan AFM and the samples were prepared by dropping the corresponding reaction solution onto mica, dried naturally. FT-IR spectra were recorded at a PerkinElmer Spectrometer II. Fluorescence spectra were recorded on a Hitachi F-7000. Dynamic light scattering (DLS) studies were performed on Malvern Zetasizer Nano-ZS90.

**Synthetic Procedures**

**I. Synthesis of A1/A2-diamino-substituted pillar[5]arene (DAP5) *(***[***1***](#_ENREF_1)**)**

**Synthesis of pillar[5]arene (2)** *(*[*2*](#_ENREF_2)):To a solution of *para*-dimethyl hydroquinone (27.6 g, 0.2 mol) and polyoxymethylene (27.0 g, 0.3 mol) in dichloroethane (750 mL) was added BF3.Et2O (26 mL, ‎29.9 g, 0.21 mol), resulting a mixture which was stirred at 30 ºC for 30 min, diluted with MeOH (100 mL) and concentrated. The residue was subjected to column chromatography to afford **2** as a write solid (22.5 g, 75%).

**Synthesis of pillar[4]arene[1]quinone (3)** *(*[*3*](#_ENREF_3)): To a solution of compound 2 (15.0 g，20.0 mmol) in CH2Cl2 (300 mL) was added a solution of (NH4)2[Ce(NO3)6] (22.0 g, 4.0 mmol) in water (30 mL) dropwise to result in a mixture which was stirred at room temperature for 30 min. The organic phase was washed with water (100 mL x 3), and concentrated under reduced pressure. The residue was subjected to column chromatography to afford **3** as a red solid (8.8 g, 63 %).

**Synthesis of pillar[4]arene[1]hydroquinone (4)** *(*[*4*](#_ENREF_4)): To a solution of compound **3** (21.4 g, 30.0 mmol) in a mixed solvent of CH2Cl2 and MeOH (600 mL, 2:1, v/v) was added NaBH4 (2.8 g, 75.0 mmol) to result in a mixture which was stirred at room temperature till the red color of solution faded. An aqueous HCl solution (1.0 M, 50 mL) was added into the mixture. The organic phase was concentrated and dried under reduced pressure to give crude **4** which was used for next step reaction without purification.

**Synthesis of compound 5** *(*[*1*](#_ENREF_1)): To a solution of compound **4** (18.0 g, 25.0 mmol) in CH2Cl2 (400 mL) was added pyridine (8.0 mL, 100.0 mmol) resulting in a mixture which was stirred at 0 ºC for 5 min. Triflic anhydride (10.0 mL, 60.0 mmol ) was added into the reaction mixture dropwise and the mixture was stirred at room temperature for another 12 h. The reaction was quenched by added aqueous HCl solution (1.0 M, 100 mL). The organic phase was concentrated, and the residue was purified by column chromatography to afford **5** as a white solid (19.7 g, 80%).

**Synthesis of compound 6** *(*[*1*](#_ENREF_1)): A mixture of compound **5** (4.9 g, 5.0 mmol), Cs2CO3 (4.8 g, 15.0 mmol), XPhos (216.0 mg, 0.5 mmol), Pd(OAc)2 (112.0 mg, 0.5 mmol) and NH2Boc (1.8 g, 15.0 mmol) in dioxane (200 mL) was heated at 100 oC under nitrogen for 4 h, and filtered to remove the solid. The filtrate was concentrated under reduced pressure, and the residue was purified by column chromatography (EtOAc/petroleum ether = 1:20, *ν/ν*) to afford **6** as a white solid (4.37 g, 95%).

**Synthesis of DAP5** *(*[*1*](#_ENREF_1)):To a solution of compound **6** (2.0 g，2.2 mmol) in CH2Cl2 (50 mL) was added CF3COOH (5 mL) resulting a mixture which was stirred at room temperature for 12 h. The reaction mixture was concentrated and dried under reduced pressure to afford a crude product. Recrystallization of the crude product in a mixed solvent of CH2Cl2 and petroleum ether afforded **DAP5** as a pale solid (1.9 g, 92%).

**II. Synthesis of tri-formaldehyde(4,4',4''-(benzene-1,3,5-triyltris(ethyne-2,1-diyl))tris(2-hydroxy- benzaldehyde)) (BTTH)**

**1,3,5-Triethynylbenzene (8)** *(*[*5*](#_ENREF_5)): A mixture of 1,3,5-tribromobenzene (3.1 g, 10.0 mmol), Pd(PPh3)2Cl2 (0.7 g, 1.0 mmol), CuI (189.0 mg, 1.0 mmol), and Et3N (30 mL) in a two neck round-bottom flask was degassed, purged with N2 and stirred at 30 °C for 20 min under N2 . After trimethylsilylacetylene (5.1 mL, 36.0 mmol) was added into the flask, the mixture was heated at 50 ºC for 4 h under N2, poured into water (250 mL), neutralized with an aqueous HCl solution (1.0 M), and extracted with CH2Cl2 (3 × 60 mL). The combined organic extracts were concentrated under reduced pressure to result in a residue that was dissolved in MeOH (30 mL). After Cs2CO3 (15.0 g) was added, the solution was stirred at room temperture for 12 h, filtered to remove solid, and concentrated under reduced pressure. The resulting residue was subjected to column chromatography to afford compound **8** as a grey solid (1.2 g, 80 %).

**BTTH:** A mixture of compound **8** (750.0 mg, 5.0 mmol), 4-bromo-2-hydroxybenzaldehyde (9) (3.2 g, 16.0 mmol), Pd(PPh3)2Cl2 (288.0 mg, 0.5 mmol), CuI (85.0 mg, 0.5 mmol), and Et3N (20 mL) in a round-bottom flask was degassed, purged with N2, and heated at 80 ºC under N2 for 6 h. After being cooled to room temperature**,** the reaction mixture was poured into water (200 mL), neutralized with an aqueous HCl solution (1.0 M), and extracted with CH2Cl2 (3 × 50 mL). The combined organic extracts were concentrated, and the residue was subjected to column chromatography to afford **BTTH** as a yellowish solid (1.5 g, 59%).1H NMR (500 MHz, CDCl3) δ 11.10 (s, 3H), 9.94 (s, 3H), 7.76 (s, 3H), 7.59 (d, *J* = 7.8 Hz, 3H), 7.19 (d, *J* = 8.2 Hz, 3H), 7.17 (s, 3H). 13C NMR (126 MHz, CDCl3) δ 195.87, 161.32, 135.14, 133.62, 131.04, 123.52, 123.10, 120.56, 120.39, 91.45, 89.85. MS (ESI): calcd for C33H18O6- [M - H]- = 509.1031, found *m/z* 509.0771.

**III. Synthesis of 1,3,5-tris(p-formylphenyl)benzene (TFPB)**

**1,3,5-tris(p-formylphenyl)benzene (TFPB)** *(*[*6*](#_ENREF_6)):A mixture of compound 7 (3.1 g, 10.0 mmol), (4-formylphenyl)boronic acid (10) (5.0 g, 33 mmol), Pd(PPh3)4 (1.2 g, 1.0 mmol), K2CO3 (8.9 g, 50.0 mmol) in THF (50 mL) was degassed, purged with N2 and heated at 100 ºC under N2 for 18 h. After being cooled to room temperature**,** the reaction mixture was concentrated, and the residue was purified by column chromatography to afford **TFPB** as an off-white solid (2.0 g, 51%). 1H NMR (500 MHz, CDCl3) δ 10.13 (s, 1H), 8.06 (d, *J* = 7.8 Hz, 2H), 7.94 (s, 1H), 7.90 (d, *J* = 7.9 Hz, 2H).

**IV. Synthesis of DAP5-COM-1 and DAP5-COM-2**

**DAP5-COM-1**

A solution of **DAP5** (48.0 mg, 0.05 mmol) and**BTTH** (17.0 mg, 0.033 mmol) in dioxane (25 mL) was added into a hydrothermal synthesis reactor which was then placed in an oven at 120 °C and left undisturbed. After 3 days, the solution was used for characterizations directly without any purification.

**DAP5-COM-2**

A solution of **DAP5** (48.0 mg, 0.050 mmol) and **TFPB** (13.0 mg, 0.033 mmol) in dioxane (25 mL) was added into a hydrothermal synthesis reactor which was then placed in an oven at 120 °C and left undisturbed. After 3 days, the solution was used for characterizations directly without any purification.

**
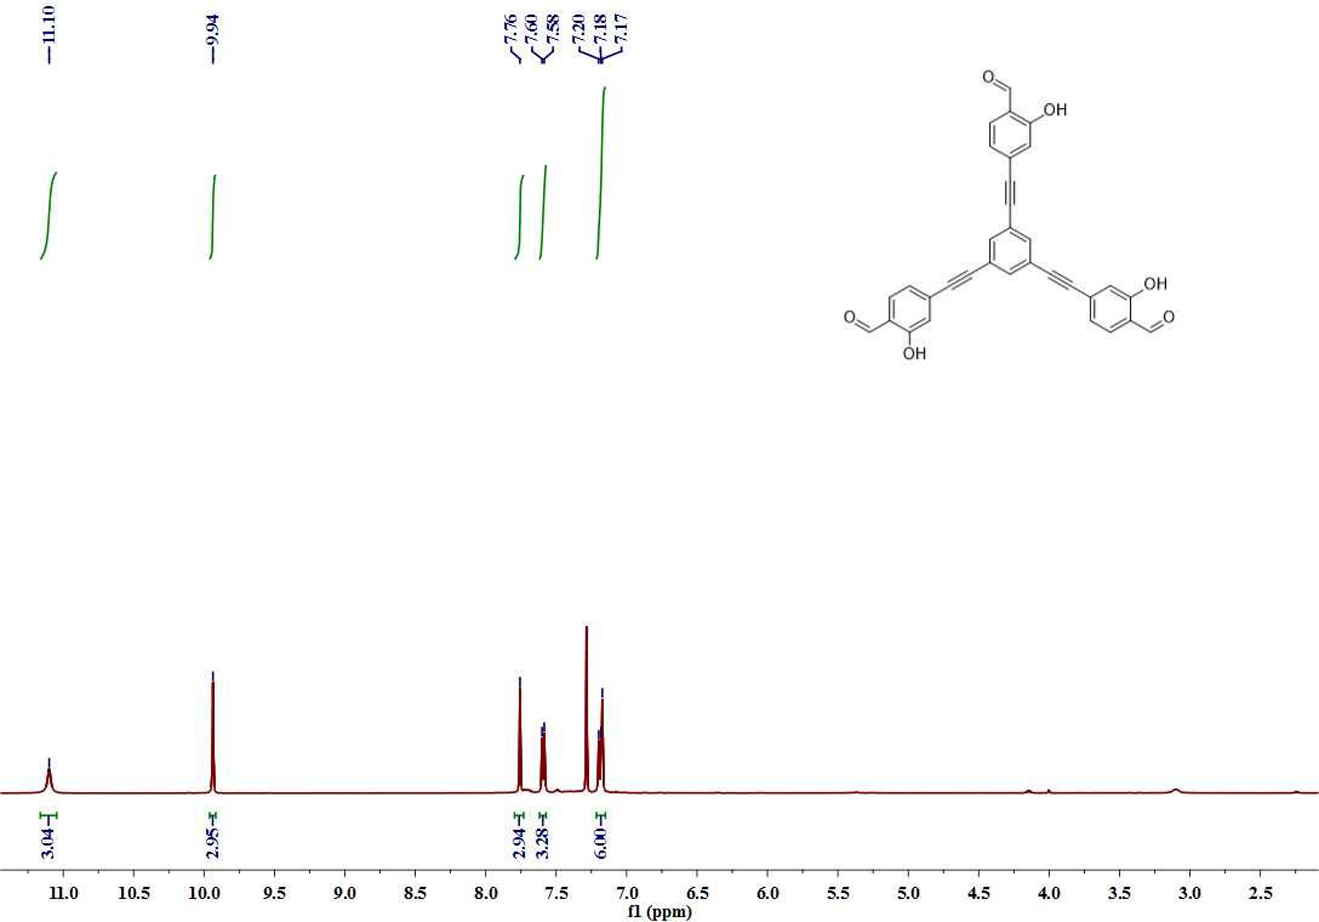
Figure S1.** 1H NMR spectrum (500 MHz, CDCl3) of **BTTH**.

**
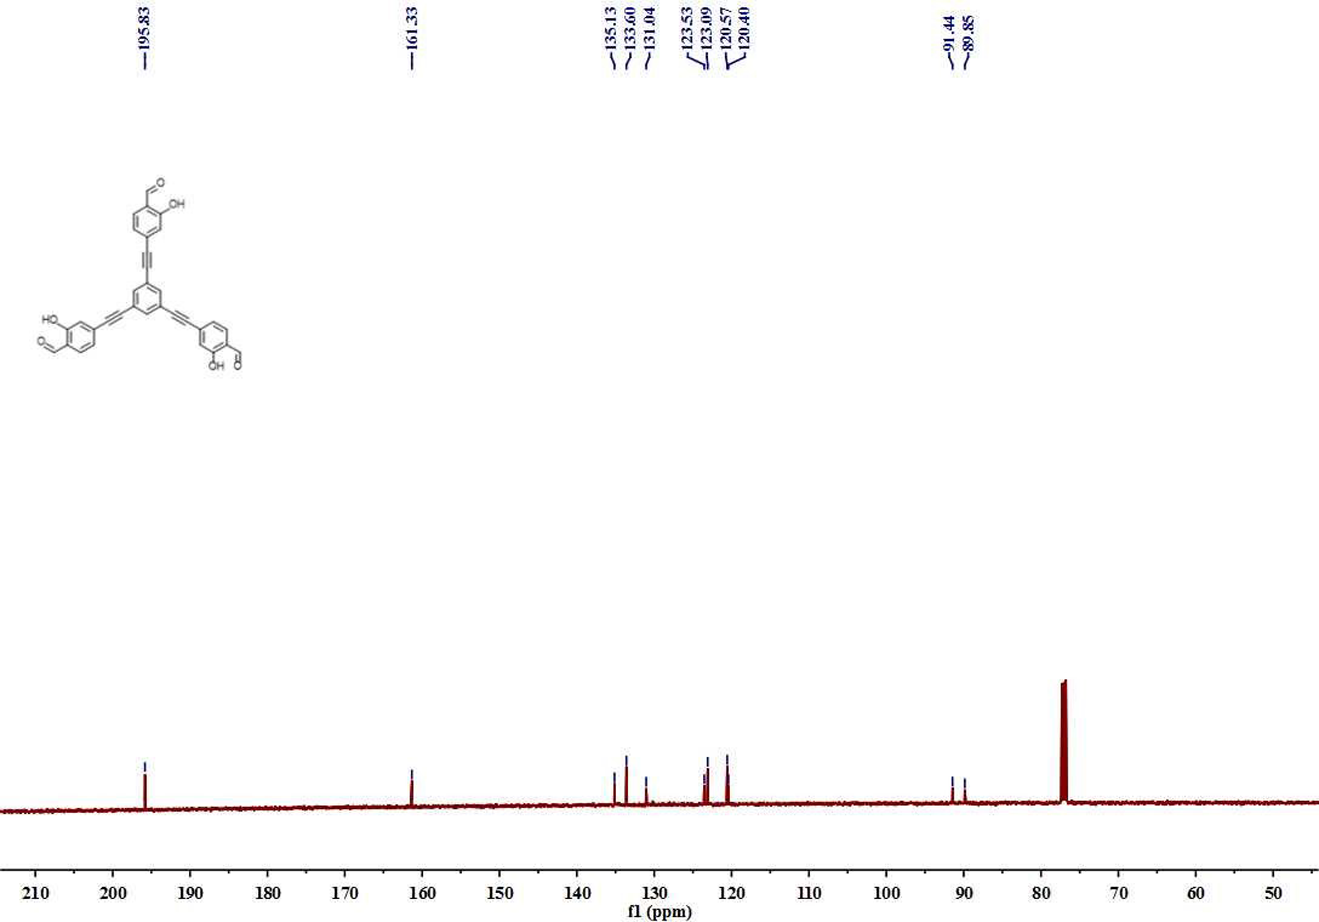
**

**Figure S2.** 13C NMR spectrum (126 MHz, CDCl3) of **BTTH**.

**
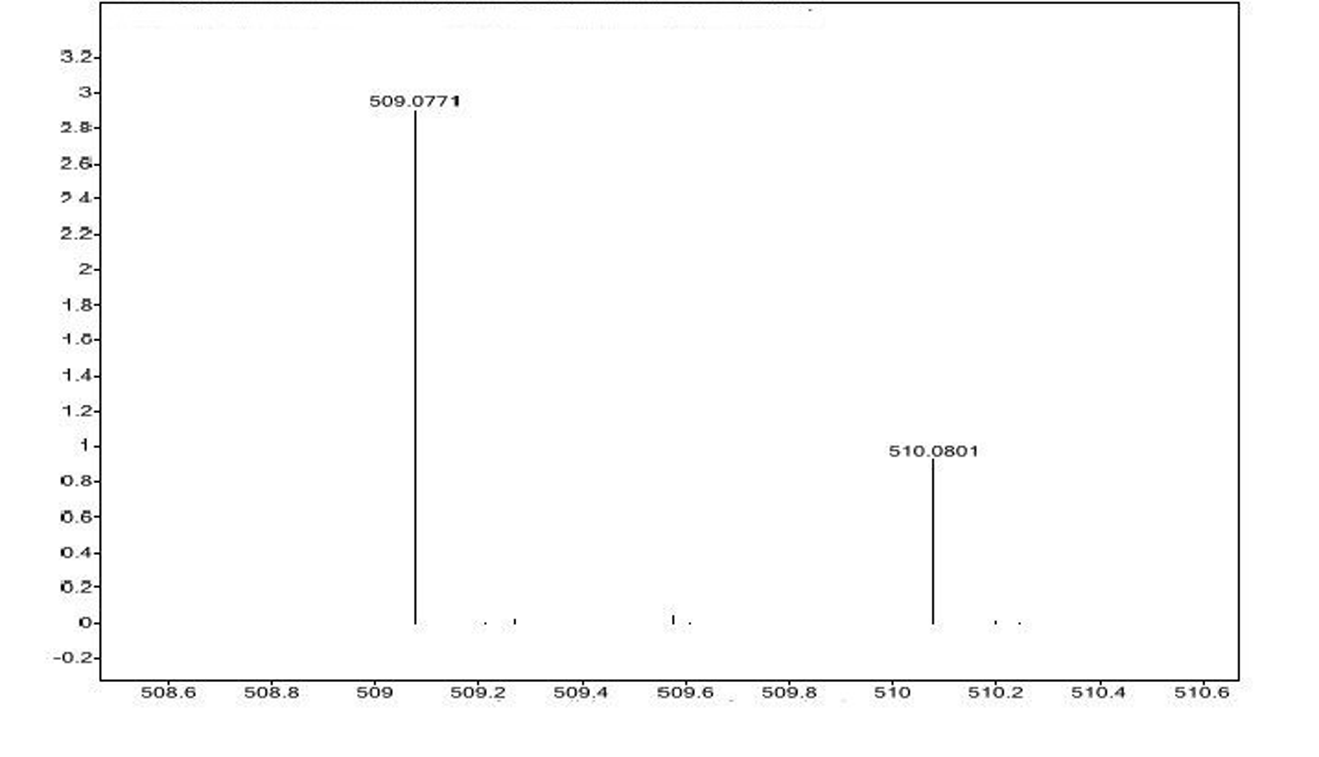
Figure S3.** MS spectrum of **BTTH**.

**
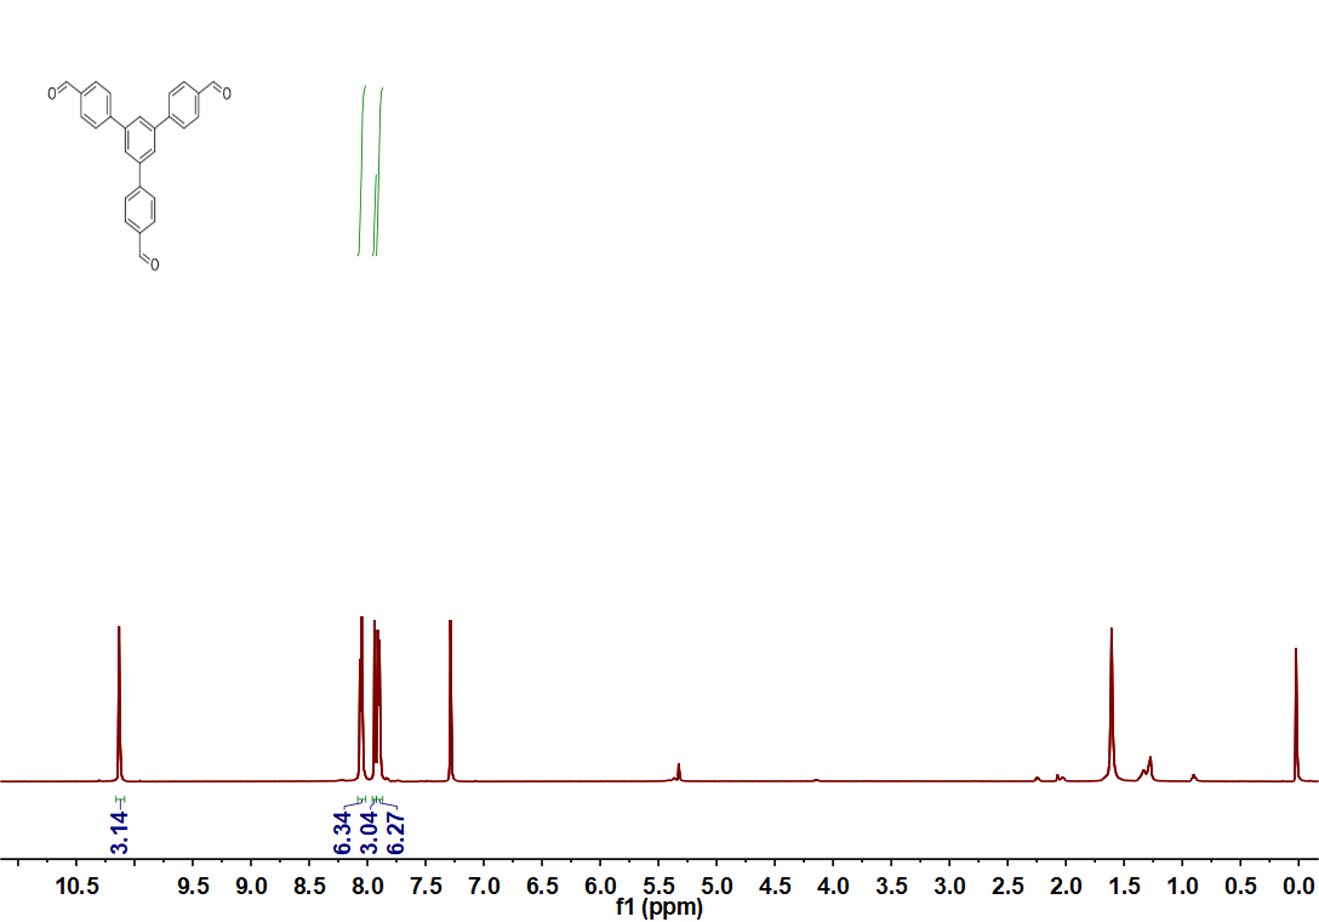
Figure S4.** 1H NMR spectrum (500 MHz, CDCl3) of **TFPB**.

**
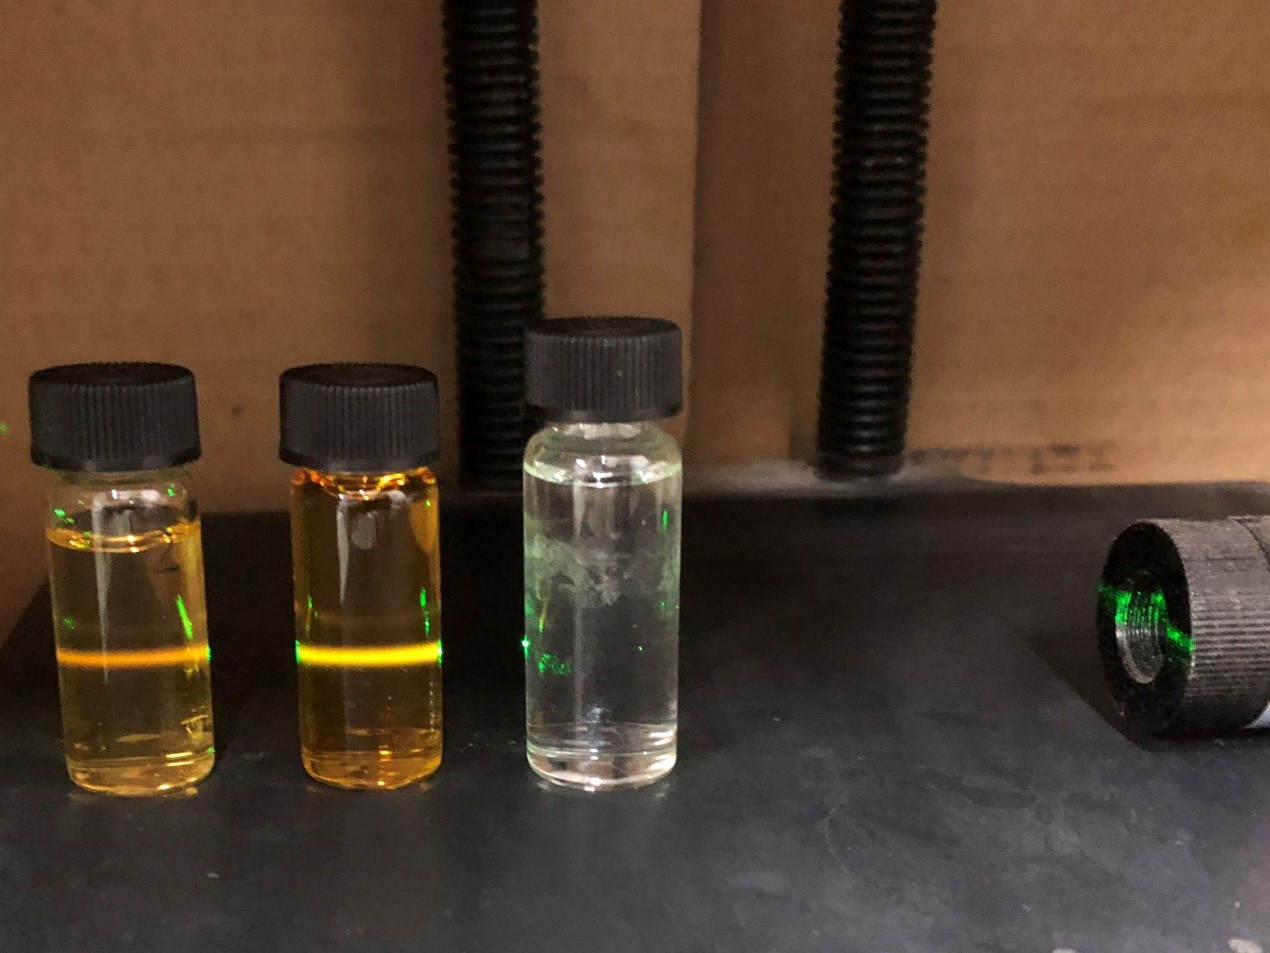
Figure S5.** Tyndall effects: **DAP5-COM-2** in dioxane (left), **DAP5-COM-1** in dioxane (middle), and dioxane (right).

**
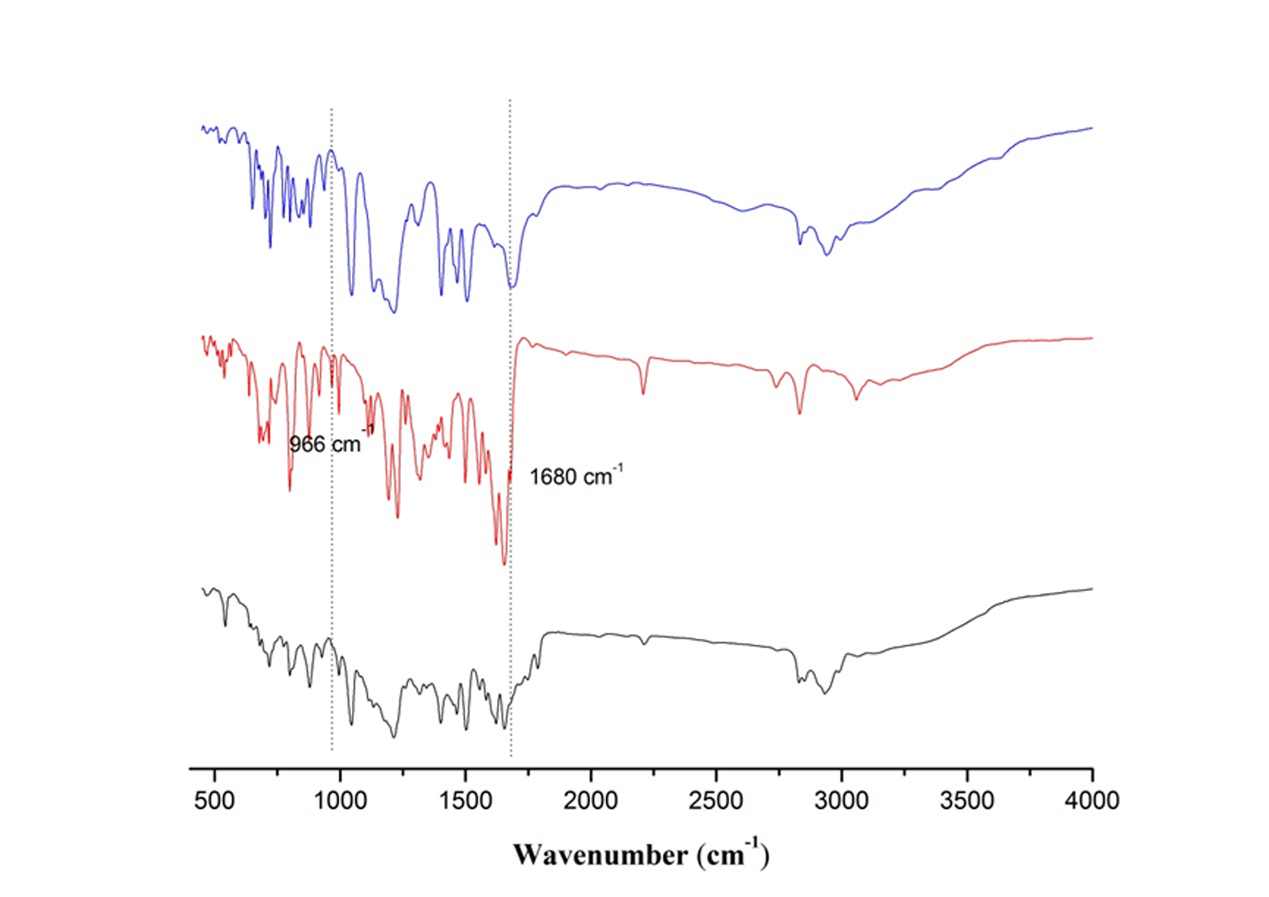
Figure S6.** FT-IR spectra of **DAP5** (top), **BTTH** (middle), and **DAP5-COM-1** (bottom).

**
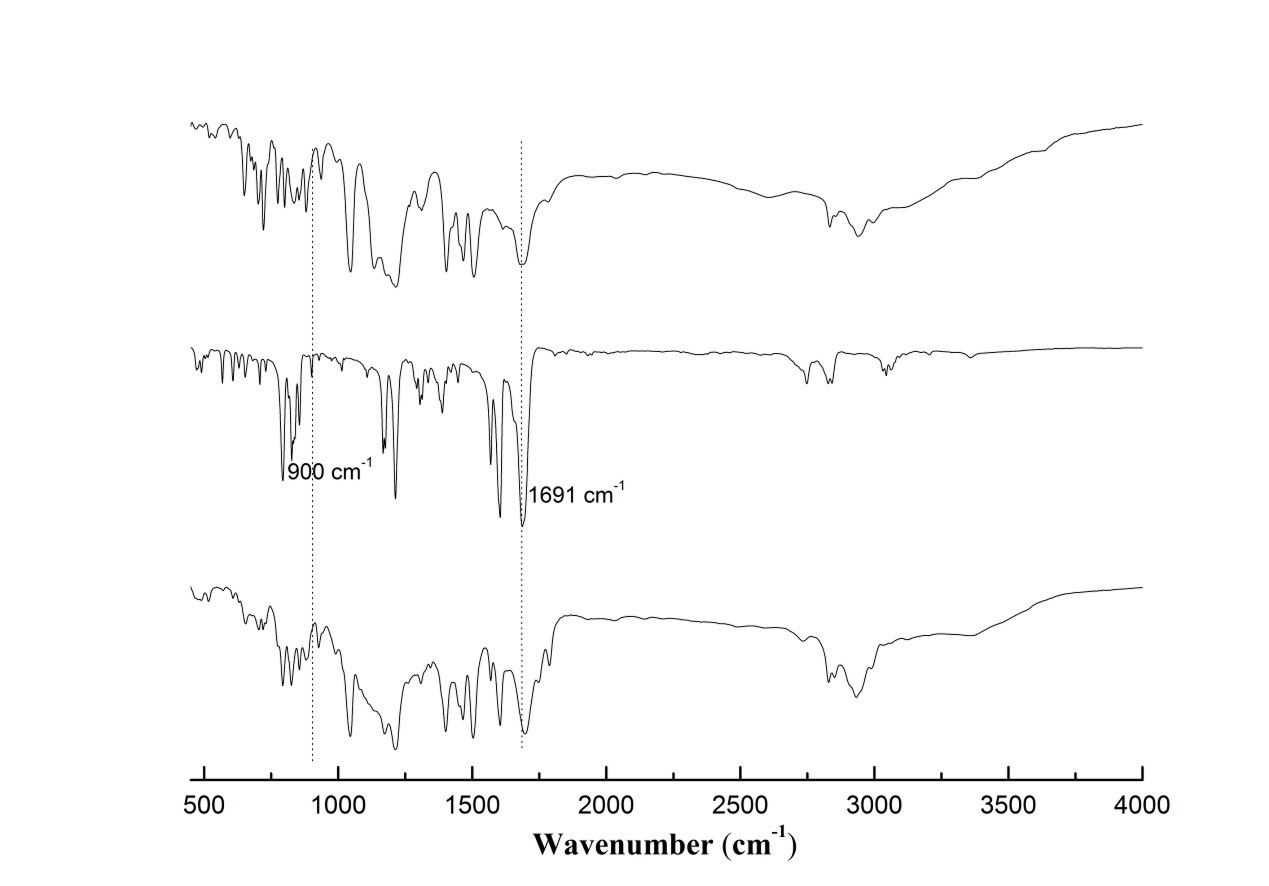
Figure S7.** FT-IR spectra of **DAP5 (top**), **TFPB** (middle), and **DAP5-COM-2** (bottom).

**
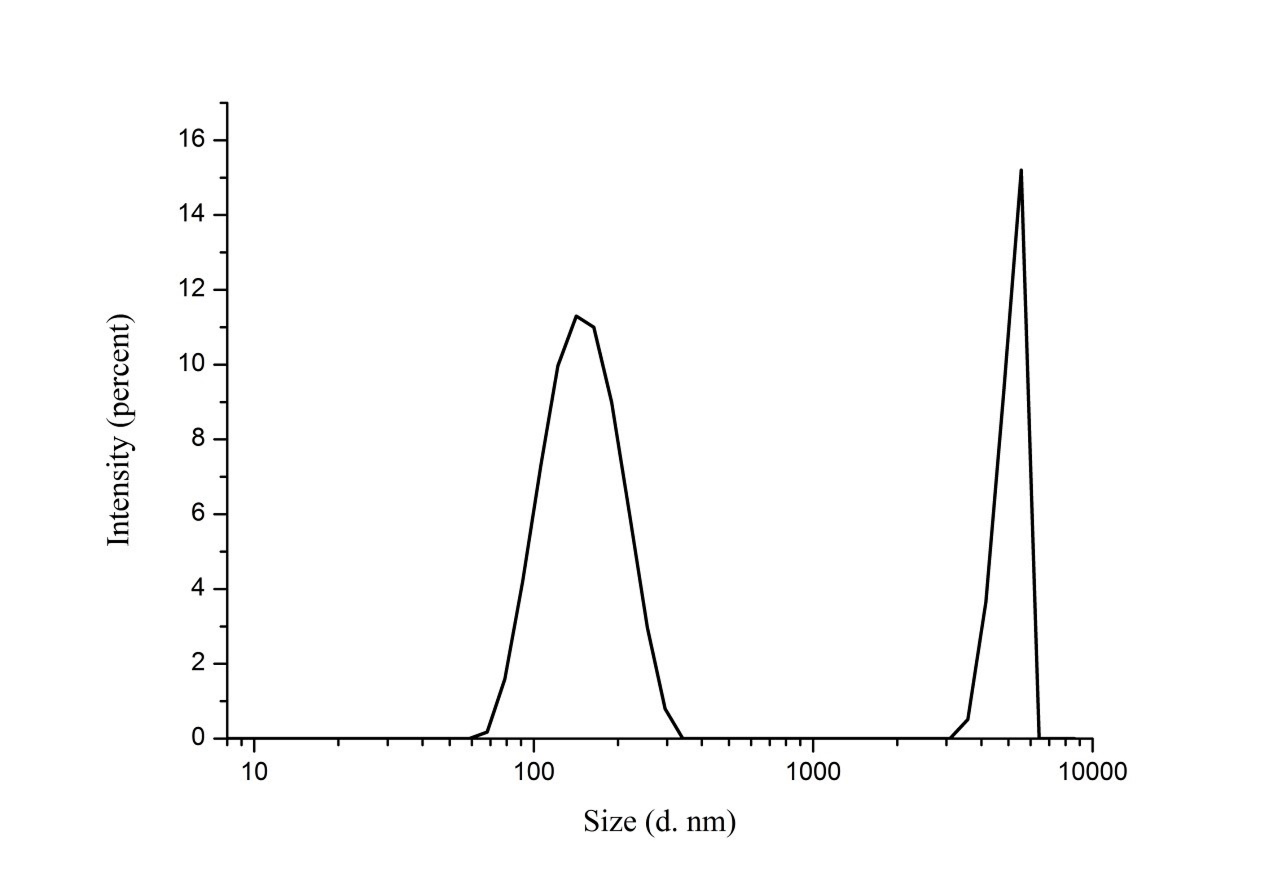
Figure S8.** Size distribution of the dispersed polymer particles of **DAP5-COM-1** in dioxane solution showed two peaks at 142 nm and 5560 nm. The larger size may indicte the existence of aggregated species.

**
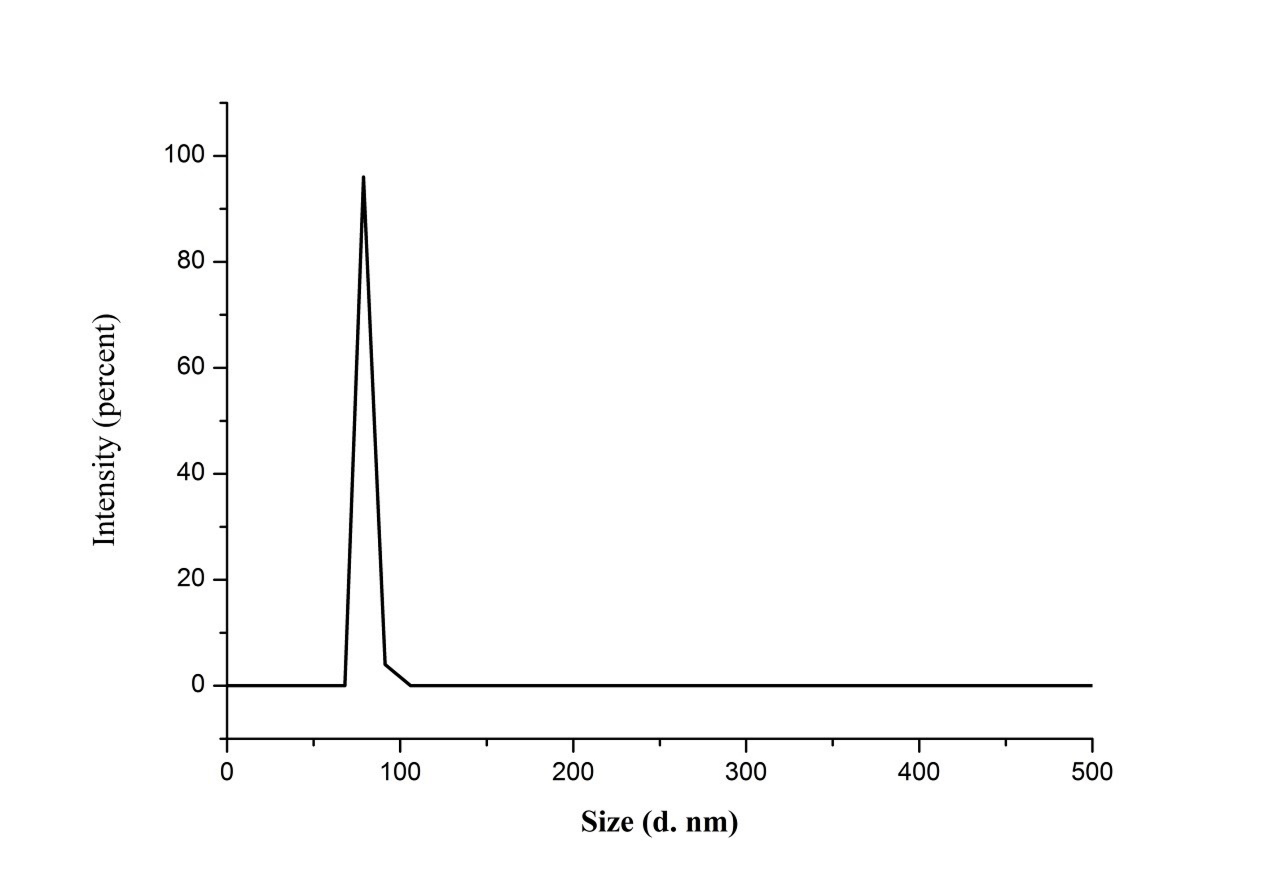
Figure S9.** Size distribution of the dispersed polymer particles of **DAP5-COM-2** in dioxane solution showed only one peak at 78 nm.

**
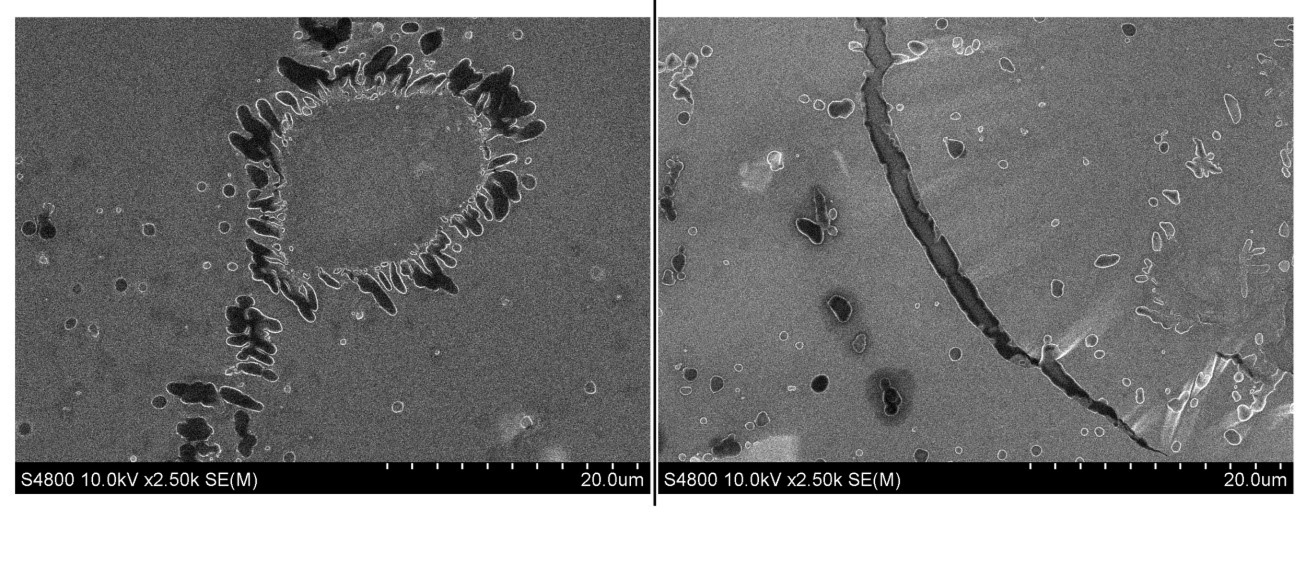
Figure S10.** SEM images of **DAP5-COM-2**. Samples were prepared by dropping the sample solution onto silicon wafers, dried naturally, and then coated with gold using a sputter coater.

**
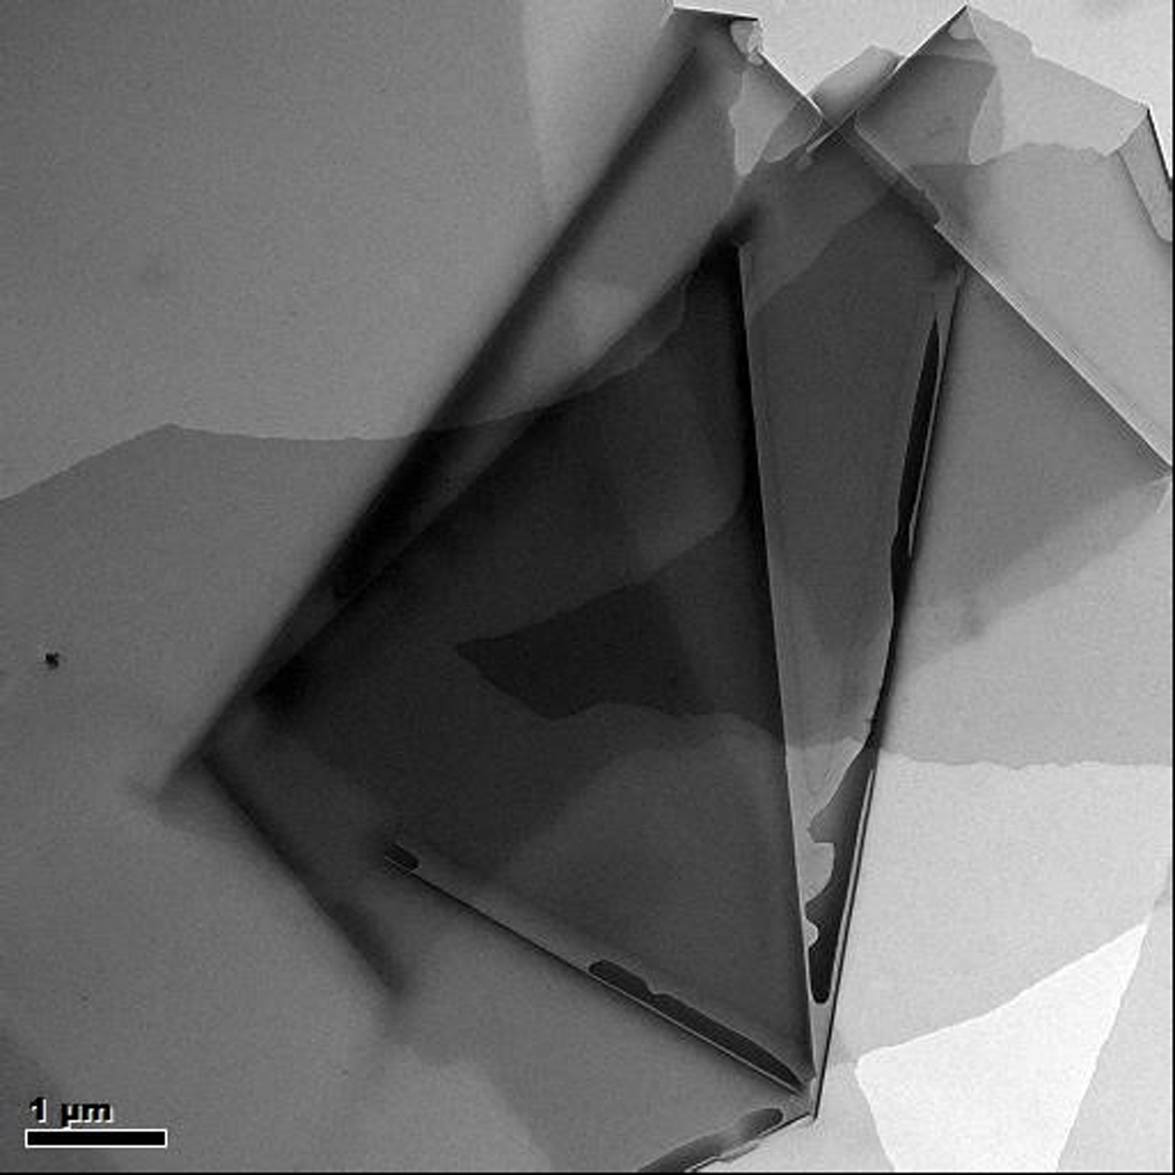
Figure S11.** TEM image of **DAP5-COM-2**. Samples were prepared by carefully dropping the **DAP5-COM-2** solution onto the carbon coated copper grid and dried naturally.

**
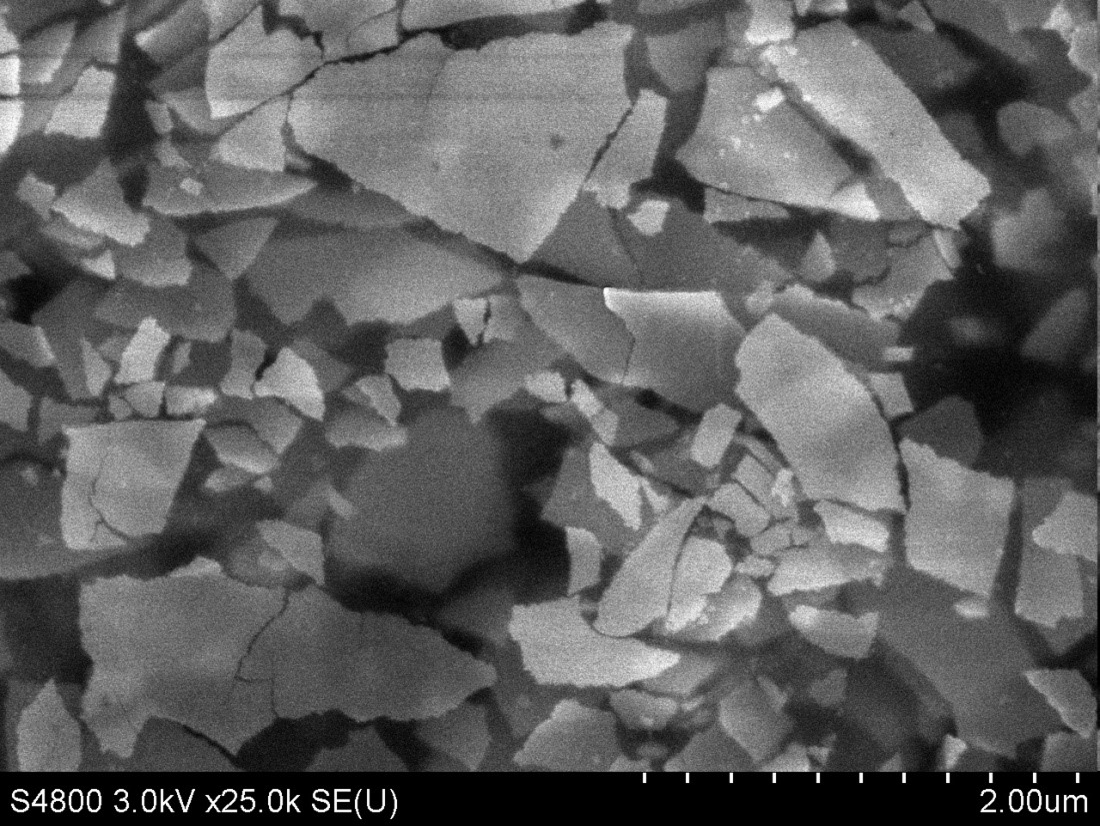
Figure S12.** SEM images of reaction solution of **DAP5** and **TFPB** with high monomer concentration.

**
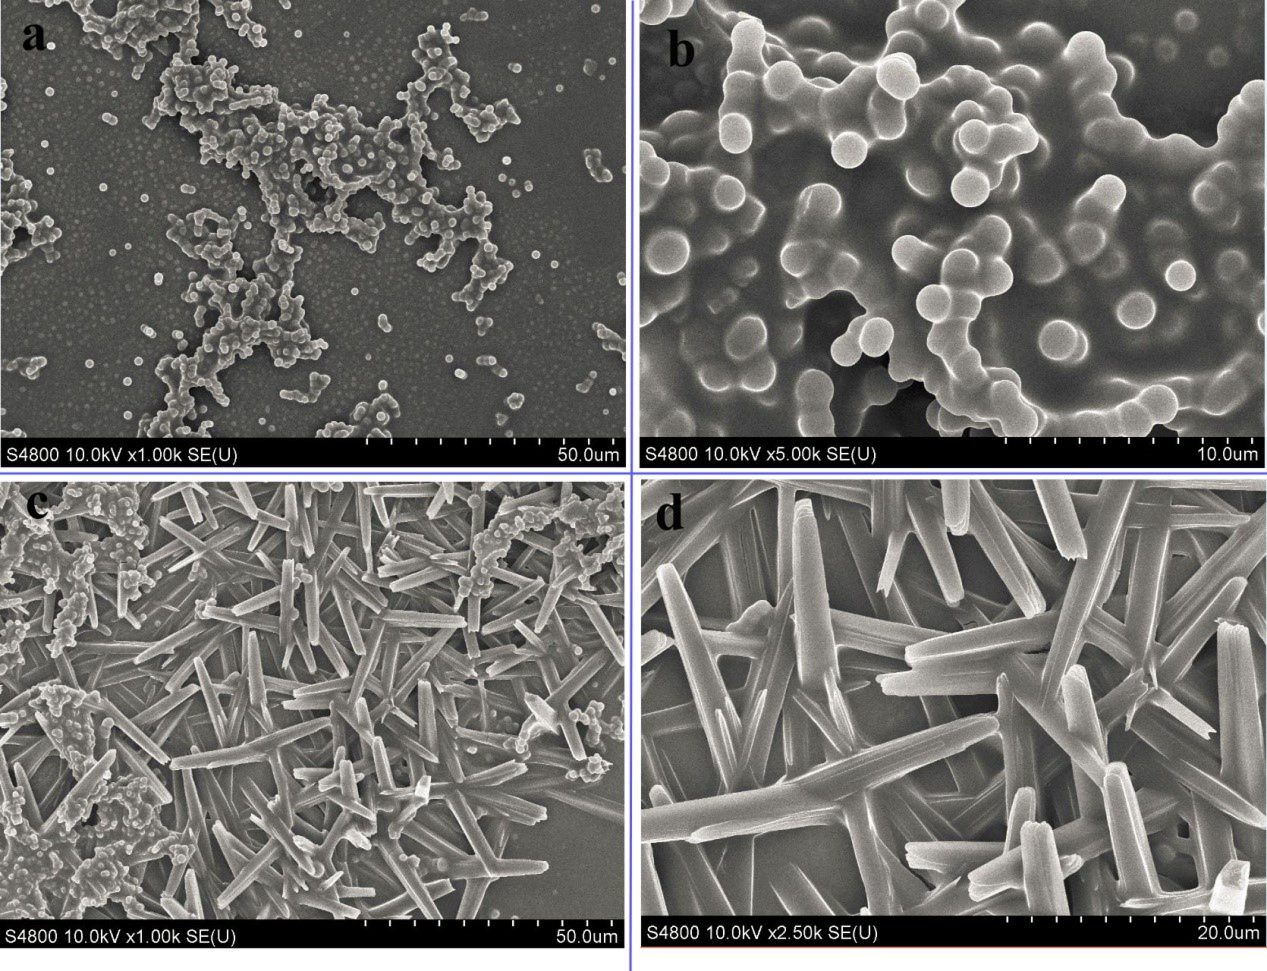
Figure S13.** SEM images of reaction solution of **DAP5** and **TFPB** when 1, 4-dioxane/mesitylene(1:2) was used as a solvent, aggregated **COMs** were observed.

**Figure S14.** Structures of the ideal hexagonal monomeric network units of **DAP5-COM-1** and **DAP5-COM-2** (the pore diameters were calculated by density functional theory (DFT) method at the PWC level).

**
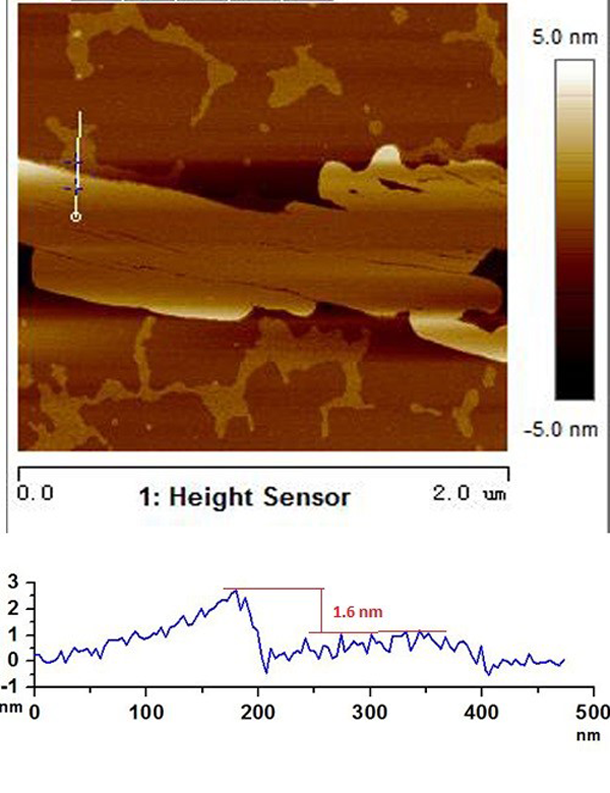
Figure S15.** AFM images and cross-section analysis of **DAP5-COM-1**. Samples were prepared by dropping the corresponding reaction solution onto mica, dried naturally.

**
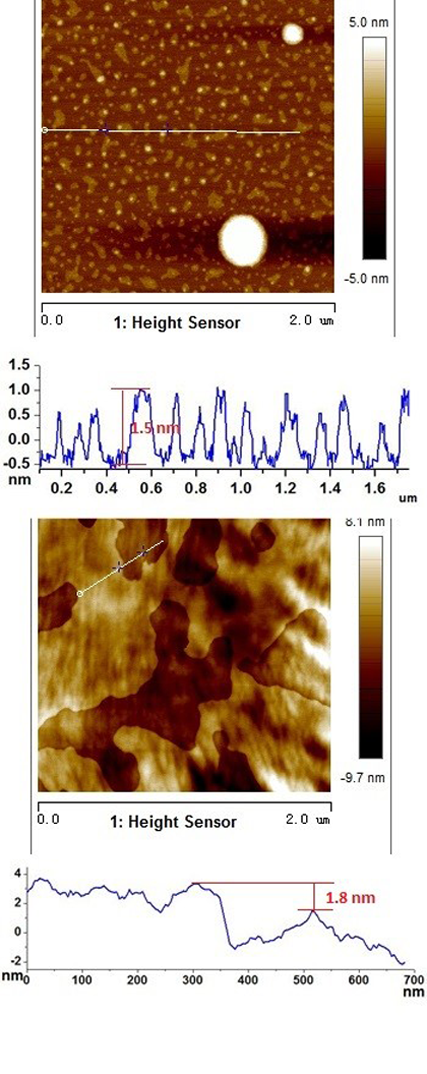
**

**Figure** **S16.** AFM images and cross-section analysis of **DAP5-COM-2**. Notes: brighter features on the sheet surface indicated certain agglomerates or ill-defined aggregates existed.

**
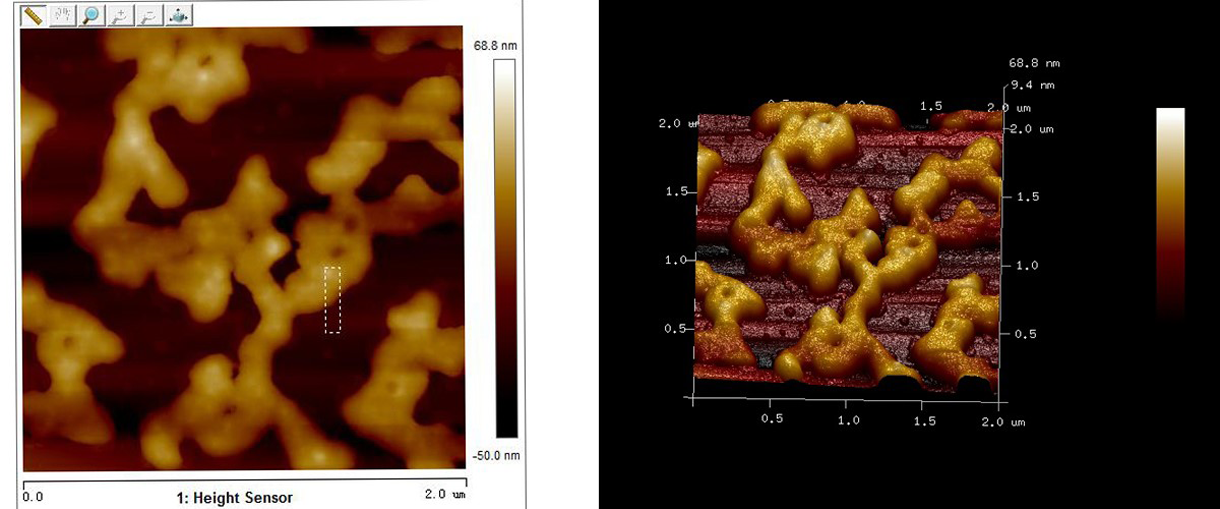
**

**Figure S17.** AFM images and cross-section analysis of the mixture of **DMP5** and **BTTH** (3:2, molar ratio) in dioxane without heating.

**
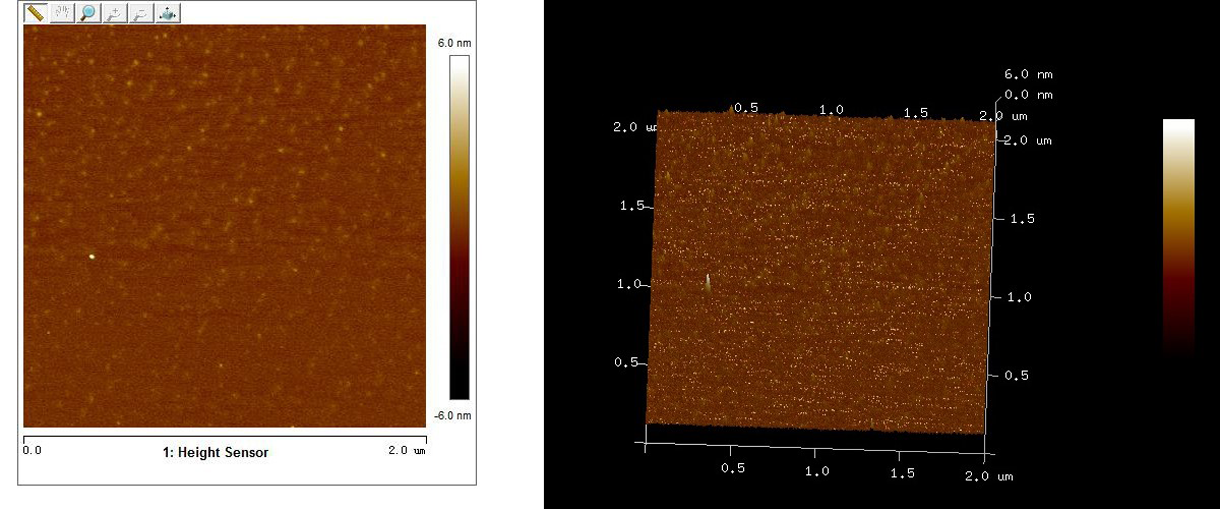
**

**Figure S18.** AFM images and cross-section analysis of the mixture of **DMP5** and **TFPB** (3:2, molar ratio) in dioxane without heating.


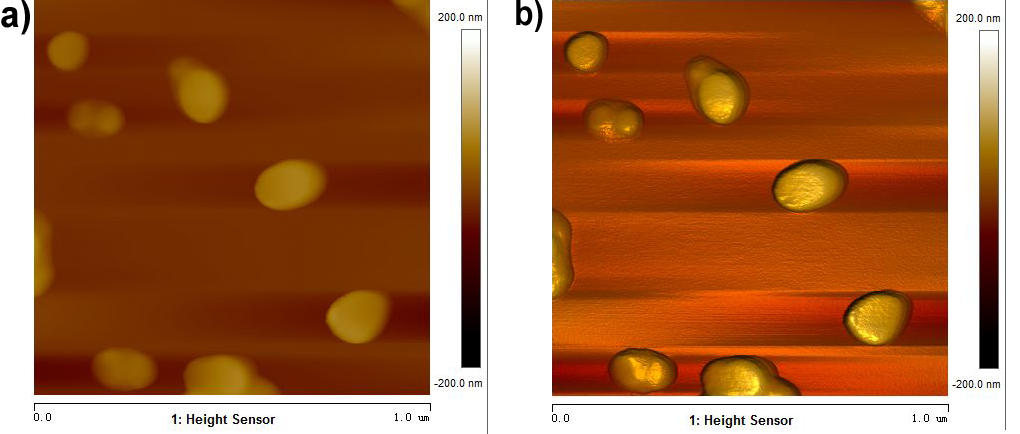


**Figure S19.** AFM images of **DAP5-COM-1** at 7 days.

**
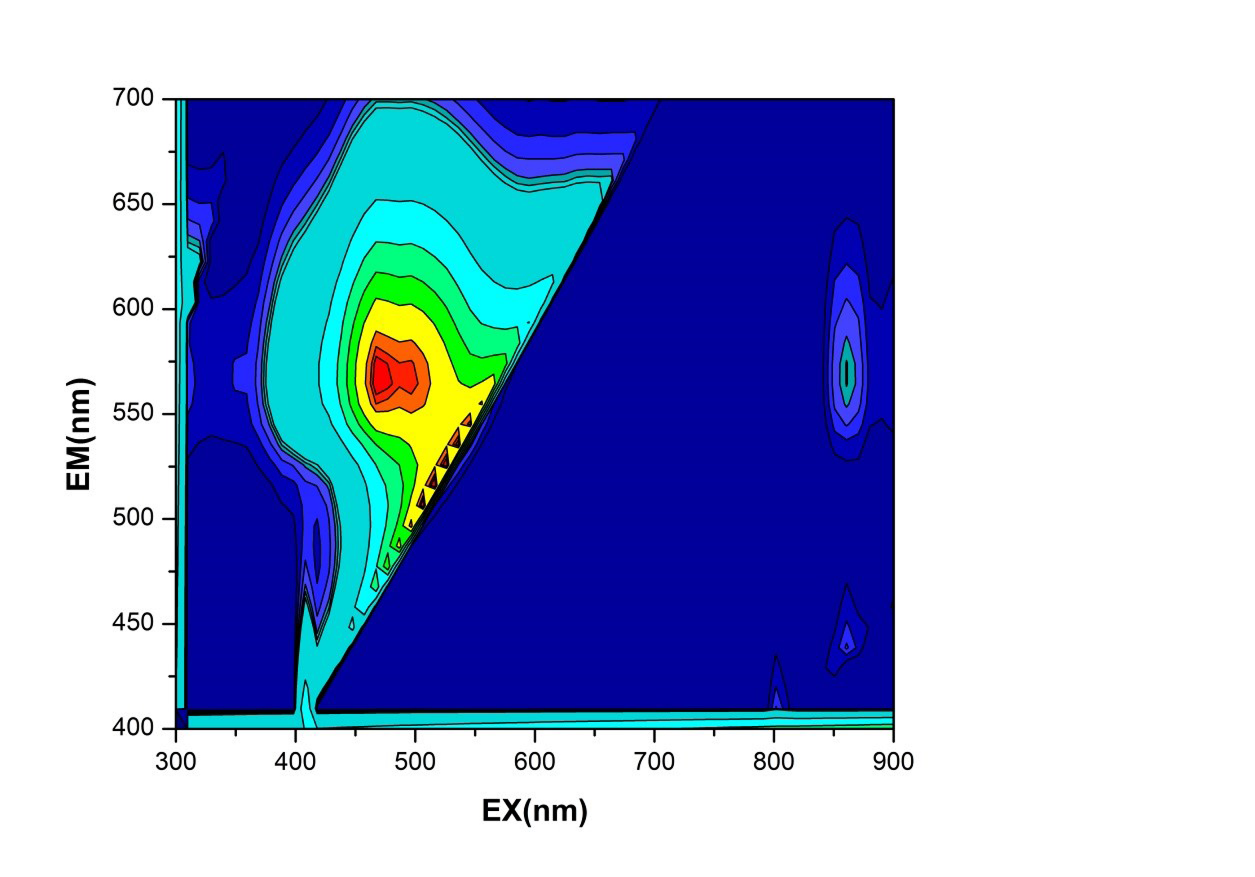
Figure S20.** 3D fluorescence contour spectroscopy of **DAP5-COM-1** in dioxane (EX Slit: 2.5 nm, EM Slit: 5.0 nm, PMT Voltage: 950 V).

**
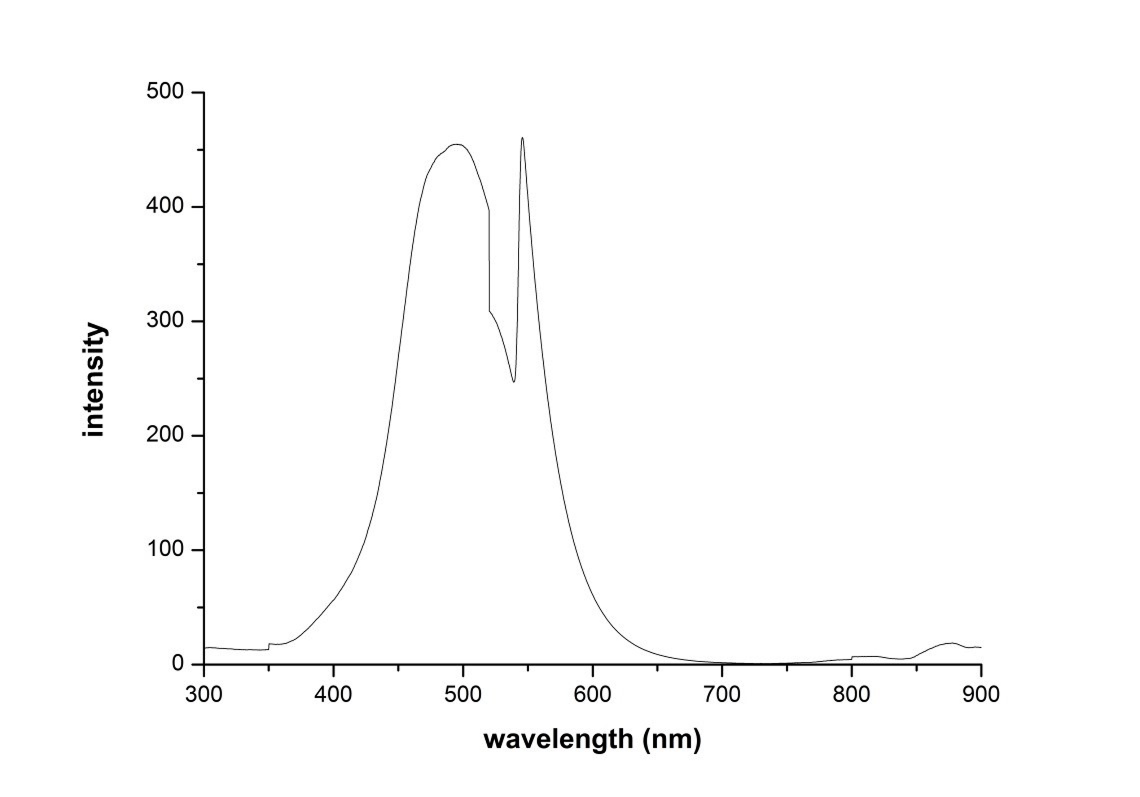
Figure S21.** Excitation spectrum of **DAP5-COM-1** in dioxane (EX Slit: 2.5 nm, EM Slit: 2.5 nm, PMT Voltage: 700 V).

**
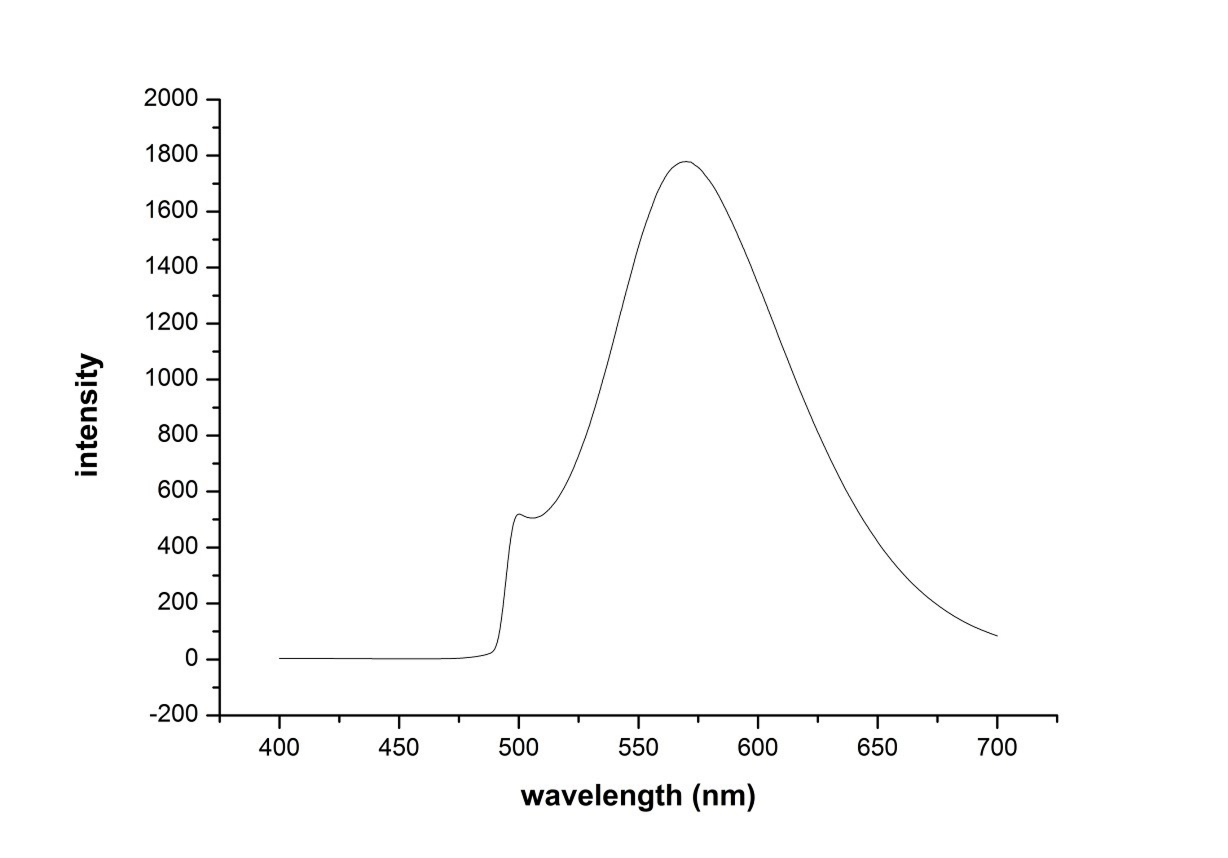
Figure S22.** Emission spectrum (EX=494 nm or 870 nm) of **DAP5-COM-1** in dioxane (EX Slit: 2.5 nm, EM Slit: 5.0 nm, PMT Voltage: 700 V).

**References**

(1) Hu, W. B.; Hu, W. J.; Zhao, X. L.; Liu, Y. H. A.; Li, J. S.; Jiang, B. A.; Wen, K. *J. Org. Chem.* **2016,** *81*, 3877-3881.

(2) Ogoshi, T.; Aoki, T.; Kitajima, K.; Fujinami, S.; Yamagishi, T.; Nakamoto, Y. *J. Org. Chem.* **2011,** *76*, 328-331.

(3) Xie, C. D.; Hu, W. B.; Hu, W. J.; Liu, Y. A.; Huo, J. C.; Li, J. S.; Jiang, B.; Wen, K. *Chin. J. Chem.* **2015,** *33*, 379-383.

(4) Hu, W. B.; Yang, H. M.; Hu, W. J.; Ma, M. L.; Zhao, X. L.; Mi, X. Q.; Liu, Y. A.; Li, J. S.; Jiang, B.; Wen, K. *Chem. Commun.* **2014,** *50*, 10460-10463.

(5) Wright, A. T.; Zhong, Z. L.; Anslyn, E. V. *Angew. Chem. Int. Edit.* **2005,** *44*, 5679-5682.

(6) Jiang, S.; Bacsa, J.; Wu, X. F.; Jones, J. T. A.; Dawson, R.; Trewin, A.; Adams, D. J.; Cooper, A. I. *Chem. Commun.* **2011,** *47*, 8919-8921.
